# Supplementary material for: SARS-CoV-2 surveillance strategy in essential workers of the Madrid City Council during the first epidemic wave in Spain, March–July 2020
Source: HighWire-hosted journal article supplement (doi:10.1136/oemed-2021-107654), 2021-10-01
Supplement: oemed-2021-107654supp001_data_supplement.pdf [file oemed-2021-107654supp001_data_supplement.pdf]

## **SARS-CoV-2 surveillance strategy in essential workers of the Madrid City Council during the first epidemic wave in Spain, March-July of 2020**

Mercedes Martinez-Cortes<sup>1\*</sup>, Carmen María Leon-Dominguez<sup>1</sup>, Jovita Fernandez-Piñero<sup>4</sup>, Mercedes Rodriguez<sup>1</sup>, Mercedes Almonacid<sup>1</sup>, Maria Jose Ferrari<sup>1</sup>, Rosario Romero<sup>1</sup>, Alfonso Antonao<sup>1</sup>, Maria Dolores Rivas<sup>1</sup>, Miguel de la Fuente<sup>5</sup>, Beatriz Perez-Gomez<sup>2,3\*</sup>, Marina Pollán<sup>2,3\*</sup>

### **SUPPLEMENTARY MATERIAL**

#### **Contents**

1. Working Group for the Surveillance and Early Detection of COVID19 infection in workers of the Madrid City Council
2. Supplementary Table S1
3. Supplementary Table S2
4. Questionnaire

**Members of the Working Group for the Surveillance and Early Detection of COVID19 infection in workers of the Madrid City Council****Madrid City Council. Madrid Salud**

Antonio Prieto; Mercedes Rodriguez; Mercedes Almonacid; Alfonso Antona; M<sup>a</sup> José Ferrari; Rosario Romero; Lola Rivas; José Manuel Díaz-Olalla; Carmen María León-Dominguez; Mercedes Martínez Cortés

**Centro de Investigación en Sanidad Animal (INIA-CISA).**

Marisa Arias; Jovita Fernandez-Pinero; Miguel Angel Jimenez- Clavero; Cristina Cano-Gómez; Pilar Aguilera-Sepúlveda

**National Centre for Epidemiology, Instituto de Salud Carlos III. Consortium for Biomedical Research in Epidemiology and Public Health (CIBERESP)**

Marina Pollán Santamaría; Beatriz Perez Gomez.

**Demométrica SL**

Miguel de la Fuente; Ana Rin

Supplementary table S1: Frequency of use of protective equipment by type of work

|                                  | Mask                                 |               | Disinfectant products |               | Gloves       |               | Disposal gowns |             | Face shields |              | Goggles     |             | Protection suit |             |
|----------------------------------|--------------------------------------|---------------|-----------------------|---------------|--------------|---------------|----------------|-------------|--------------|--------------|-------------|-------------|-----------------|-------------|
| <b>Essential work collective</b> | <b>Adjusted prevalence % (95%CI)</b> |               |                       |               |              |               |                |             |              |              |             |             |                 |             |
| Telecommuting                    | <b>72.58</b>                         | 71.13 - 74.03 | <b>80.43</b>          | 79.26 - 81.60 | <b>56.41</b> | 54.88 - 57.93 | <b>4.26</b>    | 3.46 - 5.05 | <b>5.86</b>  | 4.87 - 6.86  | <b>8.45</b> | 7.37 - 9.53 | <b>4.75</b>     | 3.73 - 5.78 |
|                                  | <b>Prevalence ratio (95%CI)</b>      |               |                       |               |              |               |                |             |              |              |             |             |                 |             |
| Telecommuting                    | <b>ref</b>                           | -             | <b>ref</b>            | -             | <b>ref</b>   | -             | <b>ref</b>     | -           | <b>ref</b>   | -            | <b>ref</b>  | -           | <b>ref</b>      | -           |
| Policemen                        | <b>1.11</b>                          | 1.08 - 1.15   | <b>1.12</b>           | 1.09 - 1.15   | <b>1.15</b>  | 1.09 - 1.21   | <b>0.26</b>    | 0.18 - 0.38 | <b>0.28</b>  | 0.20 - 0.38  | <b>0.85</b> | 0.69 - 1.05 | <b>0.16</b>     | 0.11 - 0.24 |
| Bus drivers                      | <b>1.05</b>                          | 1.02 - 1.08   | <b>1.11</b>           | 1.09 - 1.13   | <b>1.03</b>  | 0.99 - 1.07   | <b>0.48</b>    | 0.36 - 0.65 | <b>0.56</b>  | 0.44 - 0.71  | <b>1.31</b> | 1.13 - 1.51 | <b>0.34</b>     | 0.23 - 0.49 |
| Cleaning Services                | <b>1.19</b>                          | 1.16 - 1.22   | <b>1.19</b>           | 1.17 - 1.21   | <b>1.51</b>  | 1.46 - 1.56   | <b>1.34</b>    | 0.98 - 1.83 | <b>1.36</b>  | 1.06 - 1.75  | <b>1.94</b> | 1.63 - 2.29 | <b>1.87</b>     | 1.42 - 2.46 |
| Firefighters                     | <b>1.26</b>                          | 1.22 - 1.30   | <b>1.15</b>           | 1.11 - 1.19   | <b>1.38</b>  | 1.30 - 1.46   | <b>1.11</b>    | 0.76 - 1.61 | <b>1.57</b>  | 1.16 - 2.12  | <b>3.90</b> | 3.16 - 4.81 | <b>4.63</b>     | 3.38 - 6.34 |
| Emergency Healthcare Services    | <b>1.30</b>                          | 1.26 - 1.34   | <b>1.20</b>           | 1.16 - 1.23   | <b>1.63</b>  | 1.56 - 1.70   | <b>5.08</b>    | 3.69 - 6.97 | <b>7.84</b>  | 6.09 - 10.10 | <b>7.93</b> | 6.66 - 9.44 | <b>7.15</b>     | 5.23 - 9.76 |
| Burial Services                  | <b>1.11</b>                          | 1.05 - 1.19   | <b>1.13</b>           | 1.08 - 1.19   | <b>1.40</b>  | 1.29 - 1.51   | <b>2.60</b>    | 1.77 - 3.83 | <b>1.54</b>  | 1.05 - 2.25  | <b>2.14</b> | 1.61 - 2.85 | <b>2.31</b>     | 1.59 - 3.35 |
| Central Market Workers           | <b>1.31</b>                          | 1.27 - 1.35   | <b>1.20</b>           | 1.17 - 1.23   | <b>1.61</b>  | 1.53 - 1.69   | <b>2.72</b>    | 1.83 - 4.05 | <b>4.24</b>  | 3.26 - 5.53  | <b>3.23</b> | 2.58 - 4.04 | <b>2.85</b>     | 2.01 - 4.05 |
| Public Health Services           | <b>1.14</b>                          | 1.10 - 1.18   | <b>1.06</b>           | 1.03 - 1.10   | <b>1.22</b>  | 1.16 - 1.29   | <b>2.03</b>    | 1.51 - 2.74 | <b>1.15</b>  | 0.85 - 1.56  | <b>0.90</b> | 0.69 - 1.18 | <b>1.05</b>     | 0.73 - 1.50 |
| Social Services                  | <b>1.01</b>                          | 0.97 - 1.06   | <b>0.99</b>           | 0.95 - 1.02   | <b>0.99</b>  | 0.92 - 1.06   | <b>1.10</b>    | 0.75 - 1.60 | <b>1.49</b>  | 1.10 - 2.02  | <b>0.64</b> | 0.45 - 0.91 | <b>0.58</b>     | 0.34 - 0.97 |

\*Adjusted for age, sex, occupation, epidemiological week and laboratory

Supplementary table S2: Distribution of tested essential workers by collective and epidemiological week

| Epidemiological Week | Policemen | Public Health Services | Social Services | Firefighters | Burial Services | Emergency Healthcare Services | Bus Drivers | Cleaning Services | Central Market Workers |
|----------------------|-----------|------------------------|-----------------|--------------|-----------------|-------------------------------|-------------|-------------------|------------------------|
| 22/03 to 28/03       | 223       | 79                     | 49              | 85           | 29              | 167                           |             |                   |                        |
| 29/03 to 04/04       | 422       | 120                    | 43              | 393          | 147             | 277                           |             |                   | 20                     |
| 05/04 to 11/04       | 423       | 66                     | 20              | 174          | 30              | 170                           |             |                   | 29                     |
| 12/04 to 18/04       | 845       | 72                     | 25              | 361          | 51              | 179                           |             |                   |                        |
| 19/04 to 25/04       | 668       | 71                     | 60              | 223          | 78              | 68                            | 29          |                   |                        |
| 26/04 to 02/05       | 1,050     | 51                     | 380             | 95           | 81              | 24                            | 311         | 393               | 62                     |
| 03/05 to 09/05       | 930       | 143                    | 301             | 25           | 14              | 4                             | 443         | 451               | 92                     |
| 10/05 to 16/05       | 1,067     | 89                     | 40              | 10           | 2               | 6                             | 433         | 472               | 81                     |
| 17/05 to 23/05       | 382       | 151                    | 74              | 18           | 5               | 3                             | 477         | 462               |                        |
| 24/05 to 30/05       | 219       | 110                    | 67              | 16           | 2               | 4                             | 406         | 350               | 15                     |
| 31/05 to 06/06       | 180       | 106                    | 7               | 3            | 2               | 2                             | 352         | 75                |                        |
| 07/06 to 13/06       | 50        | 127                    | 87              |              | 2               | 1                             | 343         | 6                 |                        |
| 14/06 to 20/06       | 15        | 91                     | 15              |              |                 | 4                             | 484         | 1                 |                        |
| 21/06 to 27/06       | 18        | 22                     | 1               |              |                 | 1                             | 273         |                   |                        |
| 28/06 to 04/07       | 32        | 72                     | 31              |              |                 |                               | 848         |                   | 37                     |
| 05/07 to 11/07       | 30        | 30                     | 7               |              |                 |                               | 940         |                   | 14                     |
| Total                | 6,554     | 1,400                  | 1,207           | 1,403        | 443             | 910                           | 5,339       | 2,210             | 350                    |

### PCR TESTING QUESTIONNAIRE MADRID CITY COUNCIL

Completing this questionnaire will not take you more than 5 minutes.

Your answers will be very useful to interpret your results.

We would like to confirm your details below. If any information is missing or incorrect, please fill it in:

|                                 |  |
|---------------------------------|--|
| <b>ID NUMBER</b>                |  |
| <b>GENDER: 1 MEN 2 WOMEN</b>    |  |
| <b>AGE (IN YEARS COMPLETED)</b> |  |
| <b>SERVICE</b>                  |  |
| <b>PHONE NUMBER</b>             |  |

**P1.** Have you had a PCR Test prior to the one on XX / XX / 20?

1. Yes
2. No

**P1a.** How many PCR test have you had?

\_\_\_ (numeric)

**P1b1.** Thinking about the most recent PCR testing, when was it?

1. Less than seven days ago
2. From 7 to 14 days
3. From 15 days to 21 days
4. More than 3 weeks ago

**P1c1.** Test result:

1. Positive
2. Negative
3. Unknown

**P1b2.** Now thinking about your first PCR test, when was it?

4. Less than seven days ago
5. From 7 to 14 days
6. From 15 days to 21 days
7. More than 3 weeks ago

**P1c2.** Test result:

1. Positive
2. Negative
3. Unknown

**P2.** From the following list of possible reasons, do you know why you were PCR tested on XX / XX / 20? Multiple answer. (P2S01, P2S02, P2S03, P2S04)

1. Because I have had symptoms of coronavirus infection
2. It is a control test because I have been in isolation
3. It is a control test because I had other previous tests
4. Although none of the above conditions exist, I work in a high risk job and that is why it is done to me
5. I don't know

**P3.** Have you had CLOSE CONTACT with anyone...? (P3S01, P3S02) Multiple answer.

1. With symptoms of coronavirus infection
2. No symptoms of coronavirus infection but tested POSITIVE
3. No, I haven't

**P3a.** You have told us that you have had CLOSE contact with someone WITH symptoms of coronavirus infection. On what date did the contact occur? (P3\_CON)

1. Less than seven days ago
2. From 7 to 14 days
3. From 15 days to 21 days
4. More than 3 weeks ago

**P3a.** You have told us that you have had CLOSE contact with someone WITHOUT symptoms of infection but who was POSITIVE in a Test. On what date did the contact occur? (P3\_SIN)

1. Less than seven days ago
2. From 7 to 14 days
3. From 15 days to 21 days
4. More than 3 weeks ago

**P3b.** In what context did the contact occur? Multiple answer. (P3BS01, P3BS02)

1. At work
2. In your personal life

**P3b1.** Contact at work. This person / s was / n... Multiple answer. (P3B1S01, P3B1S02)

1. Co-worker
2. User/patient
3. Unknown

**P3b2.** Contact in your personal life. This person / s was / n... Multiple answer. (P3b2S01, P3b2S02, P3b2S03, P3b2S04, P3b2S05, P3b2S06)

1. Partner
2. Son
3. Parent
4. Other relative
5. Friends
6. Other people (indicate who)

**P3b2.** In my personal life, other people (specify) (P3B\_B OTROS).

---

**P.4.** Have you had any of the following symptoms in the last 14 days?

**P4\_1a.** Feeling short of breath

1. Yes → P4\_1b.
2. No

**P.4\_1b.** Does it persist today?

1. Yes
2. No

**P4\_2a.** Fever over 37.7

1. Yes → P4\_2b.
2. No

**P.4\_2b.** Does it persist today?

1. Yes
2. No

**P4\_3a.** Low-grade fever (between 36.5-37.6)

1. Yes → P4\_3b.
2. No

**P.4\_3b.** Does it persist today?

1. Yes
2. No

**P4\_4a.** Dry and persistent cough.

1. Yes → P4\_4b.
2. No

**P.4\_4b.** Does it persist today?

1. Yes
2. No

**P4\_5a.** Runny nose.

1. Yes → P4\_5b.
2. No

**P.4\_5b.** Does it persist today?

1. Yes
2. No

**P4\_6a.** Sore throat.

1. Yes → P4\_6b.
2. No

**P.4\_6b.** Does it persist today?

1. Yes
2. No

**P4\_7a.** Headache

1. Yes → P4\_7b.
2. No

**P.4\_7b.** Does it persist today?

1. Yes
2. No

**P4\_8a.** Loss of smell and/or loss of taste.

1. Yes → P4\_8b.
2. No

**P.4\_8b.** Does it persist today?

1. Yes
2. No

**P4\_9a.** Fatigue, tiredness

1. Yes → P4\_9b.
2. No

**P.4\_9b.** Does it persist today?

1. Yes
2. No

**P4\_10a.** General discomfort

1. Yes → P4\_10b.
2. No

**P.4\_10b.** Does it persist today?

1. Yes
2. No

**P4\_11a.** Unusual back pain.

1. Yes → P4\_11b.
2. No

**P.4\_11b.** Does it persist today?

1. Yes
2. No

**P4\_12a.** Muscle pains

1. Yes → P4\_12b.
2. No



**P.4\_12b.** Does it persist today?

1. Yes
2. No

**P4\_13a.** Nausea / vomiting

1. Yes → P4\_13b.
2. No

**P.4\_13b.** Does it persist today?

1. Yes
2. No

**P4\_14a.** Diarrhoea

1. Yes → P4\_14b.
2. No

**P.4\_14b.** Does it persist today?

1. Yes
2. No

**P.4d1.** Have you been in any of these situations AS A PATIENT: Stay in the emergency room?

1. Yes
2. No

**P.4d2.** Have you been in any of these situations AS A PATIENT: hospital admission?

1. Yes
2. No

**P5.** Tell me if you have been diagnosed of the following conditions

|                                    | Yes | No | No answer |
|------------------------------------|-----|----|-----------|
| <b>P5_1</b> Heart disease          | 1   | 2  | 9         |
| <b>P5_2</b> Arterial hypertension  | 1   | 2  | 9         |
| <b>P5_3</b> Bronchitis / emphysema | 1   | 2  | 9         |
| <b>P5_4</b> Asthma                 | 1   | 2  | 9         |
| <b>P5_5</b> Diabetes               | 1   | 2  | 9         |
| <b>P5_6</b> Immunity problems      | 1   | 2  | 9         |

**P6.** In this pandemic, how often have you had the following experiences?

|                                                                                        | Never | Almost never | Often | Always | Don't know/no answer |
|----------------------------------------------------------------------------------------|-------|--------------|-------|--------|----------------------|
| <b>P6_1</b> Being afraid of falling ill                                                | 1     | 2            | 3     | 4      | 9                    |
| <b>P6_2</b> Feeling that I had little control over whether or not I could get infected | 1     | 2            | 3     | 4      | 9                    |
| <b>P6_3</b> Thinking that I had little chance of survival if I got infected            | 1     | 2            | 3     | 4      | 9                    |
| <b>P6_4</b> Being worried about spreading the virus to someone else                    | 1     | 2            | 3     | 4      | 9                    |
| <b>P6_5</b> Thinking that my family is worried that I might infect them                | 1     | 2            | 3     | 4      | 9                    |

**P7.** How often have you had the following experiences?

|                                                                       | Never | Almost never | Often | Always | Don't know/no answer |
|-----------------------------------------------------------------------|-------|--------------|-------|--------|----------------------|
| <b>P7_1</b> Believe that my job is at high risk of infection          | 1     | 2            | 3     | 4      | 9                    |
| <b>P7_2</b> Having a lot of stress at work                            | 1     | 2            | 3     | 4      | 9                    |
| <b>P7_3</b> Feeling that I am doing tasks that I am not prepared for  | 1     | 2            | 3     | 4      | 9                    |
| <b>P7_4</b> Thinking about quitting my job because of the coronavirus | 1     | 2            | 3     | 4      | 9                    |
| <b>P7_5</b> Feeling that people avoid my family because of my work    | 1     | 2            | 3     | 4      | 9                    |
| <b>P7_6</b> Be willing to accept the risks that my job implies        | 1     | 2            | 3     | 4      | 9                    |

**P8.** How often have you used the following protective equipment while doing your professional work?

|                                   | Never | Almost never | Often | Always | Don't know/no answer |
|-----------------------------------|-------|--------------|-------|--------|----------------------|
| <b>P8_1</b> Mask                  | 1     | 2            | 3     | 4      | 9                    |
| <b>P8_2</b> Gloves                | 1     | 2            | 3     | 4      | 9                    |
| <b>P8_3</b> Desinfectant products | 1     | 2            | 3     | 4      | 9                    |
| <b>P8_4</b> Disposables gowns     | 1     | 2            | 3     | 4      | 9                    |
| <b>P8_5</b> Face shields          | 1     | 2            | 3     | 4      | 9                    |
| <b>P8_6</b> Glasses               | 1     | 2            | 3     | 4      | 9                    |
| <b>P8_7</b> Protection suit       | 1     | 2            | 3     | 4      | 9                    |
| <b>P8_8</b> Another type          | 1     | 2            | 3     | 4      | 9                    |

**P8\_8\_Others.** Specify: \_\_\_\_\_
