# Supplementary material for: SARS-CoV-2 surveillance strategy in essential workers of the Madrid City Council during the first epidemic wave in Spain, March–July 2020
Source: HighWire-hosted journal article supplement (doi:10.1136/oemed-2021-107654), 2021-10-01
Supplement: oemed-2021-107654supp002_data_supplement.pdf [file oemed-2021-107654supp002_data_supplement.pdf]

## ABSTRACT

### Objetivos

Estudiar la prevalencia de la infección en trabajadores esenciales del Ayuntamiento de Madrid durante el confinamiento según su ocupación y características principales, además de conocer con qué frecuencia usaron los dispositivos de protección, su percepción de riesgo, y sus principales preocupaciones sobre COVID-19 durante la primera ola epidémica.

### Métodos

Se estudió la presencia de infección por SARS-CoV-2 en 30.231 trabajadores con PCR. Se recopiló información sobre los síntomas relacionados con COVID-19, los factores de riesgo asociados a la infección, el uso de equipo de protección y sobre la percepción de los trabajadores del riesgo de su empleo en relación con el contagio del virus. Se calcularon prevalencias de infección y de uso de dispositivos de protección, así como de percepción de riesgo ocupacional y de preocupación asociada con el puesto de trabajo. Además, se usaron modelos de regresión logística por edad, sexo, ocupación, semana epidemiológica y laboratorio para calcular prevalencias ajustadas y razones de prevalencia (RP).

### Resultados

La prevalencia de infección fue de 3,2% (IC95%: 3,0%–3,4%), siendo mayor entre los policías (4,4%) y los conductores de autobuses (4,2%), y más baja en el personal de emergencias sanitarias, bomberos, trabajadores del mercado central de alimentos y de los servicios funerarios (<2%). Había un exceso de riesgo en los trabajadores que informaron de contacto con casos de COVID-19 exclusivamente ocupacional (RP = 1,42; IC95%: 1,18–1,71), aunque fue menor que el asociado a exposición en el domicilio (RP = 2,75; IC95%: 2,32–3,25). La infección fue más frecuente en los trabajadores sintomáticos (RP=1,28; IC95%: 1,11–1,48), aunque 42% de las infecciones detectadas fueron asintomáticas. El uso de mascarillas (78,7%) y desinfectantes (86,3%) fue muy común y se asoció con una menor prevalencia de infección<sub>(mascarillas)</sub> PR =0,68; IC95%: 0,58–0,79; <sub>Desinfectantes</sub> PR =0,75; IC del 95%: 0,61–0,91). Más del 50% de los trabajadores sentían que su trabajo implicaba en alto riesgo de infección y estaban preocupados por infectar a otros; sin embargo, solo el 2% se planteó dejar su trabajo.

### Conclusiones

Este sistema de vigilancia permitió detectar y aislar los casos de SARS-CoV-2 entre los trabajadores esenciales, identificar las características relacionadas con la infección, conocer el uso de dispositivos de protección, y revelar las necesidades específicas de información sobre seguridad en el trabajo y apoyo psicológico de estos trabajadores.
